# Supplementary material
Source: publisher figshare collection journal article supplement (https://acs.figshare.com/ndownloader/files/4062679)
Supplement: Supplementary file 1 [file 4062679]

# Molecular Dynamics Simulations of Proton Transport in 3M and Nafion Perfluorosulfonic Acid Membranes

Ying-Lung Steve Tse<sup>a,d,†</sup>, Andrew M. Herring<sup>a,b</sup>, Kwiseon Kim<sup>c</sup>, Gregory A. Voth<sup>d,\*</sup>

<sup>a</sup>Renewable Energy Materials Research Science and Engineering Center, Colorado School of Mines, Golden, CO 80401, USA

<sup>b</sup>Department of Chemical and Biological Engineering, Colorado School of Mines, Golden, CO 80401, USA

<sup>c</sup>Computational Science Center, National Renewable Energy Laboratory, Golden, CO 80401, USA

<sup>d</sup>Department of Chemistry, James Franck Institute, and Computation Institute, the University of Chicago, Chicago, IL 60637, USA

## Supporting Information

**Table S1: Densities (g/cm<sup>3</sup>) of Nafion and 3M with F3C or SPC/Fw water at different temperatures and hydration levels ( $\lambda$ ). The external pressure was set at 1 atm.**

| $\lambda$ | Nafion<br>300 K<br>SPC/Fw | Nafion<br>300 K<br>F3C | Nafion<br>353 K<br>SPC/Fw | Nafion<br>353 K<br>F3C | 3M<br>300 K<br>SPC/Fw | 3M<br>300 K<br>F3C | 3M<br>353 K<br>SPC/Fw | 3M<br>353<br>K<br>F3C |
|-----------|---------------------------|------------------------|---------------------------|------------------------|-----------------------|--------------------|-----------------------|-----------------------|
| 5         | 1.73                      | 1.76                   | 1.68                      | 1.69                   | 1.75                  | 1.79               | 1.73                  | 1.74                  |
| 9         | 1.68                      | 1.65                   | 1.63                      | 1.65                   | 1.67                  | 1.69               | 1.63                  | 1.65                  |
| 14        | 1.58                      | 1.57                   | 1.56                      | 1.56                   | 1.58                  | 1.60               | 1.54                  | 1.54                  |

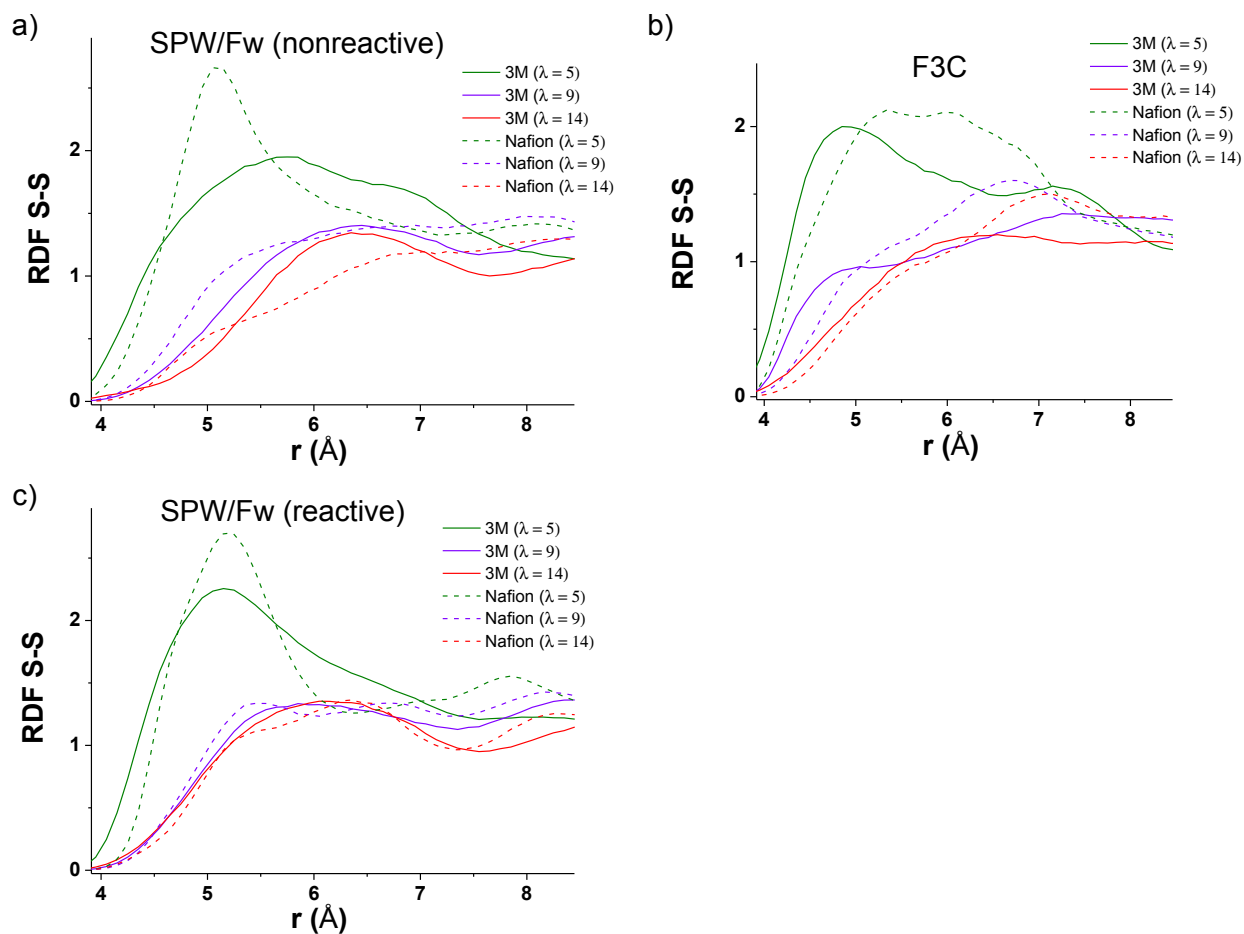

Figure S1. RDFs between the sulfonates as a function of hydration levels for the SPC/Fw water with nonreactive dynamics. The solid and dash lines are for 3M and Nafion respectively. The temperature is 300 K. b) For the F3C water (nonreactive) model. c) for SPC/Fw with reactive dynamics (MS-EVB).

**Table S2: The coordination numbers for F3C water and hydronium in the first solvation shell around a sulfonate sulfur which is defined to be between 0 and 4.25 Å.**

| $\lambda$ | No. of hydronium oxygens in the range of 0 to 4.25 Å from sulfonate sulfur. F3C |          |              |              | No. of F3C water in the range of 0 to 4.25 Å |          |              |              |
|-----------|---------------------------------------------------------------------------------|----------|--------------|--------------|----------------------------------------------|----------|--------------|--------------|
|           | 3M 300 K                                                                        | 3M 353 K | Nafion 300 K | Nafion 353 K | 3M 300 K                                     | 3M 353 K | Nafion 300 K | Nafion 353 K |
| 5         | 1.46                                                                            | 1.55     | 1.64         | 1.72         | 3.64                                         | 3.30     | 3.56         | 3.39         |
| 9         | 0.83                                                                            | 0.88     | 1.06         | 1.09         | 4.78                                         | 4.57     | 4.65         | 4.66         |
| 14        | 0.56                                                                            | 0.61     | 0.80         | 0.81         | 5.31                                         | 5.07     | 5.23         | 5.06         |
